# Supplementary material
Source: Springer Nature journal article supplement (https://www.springermedizin.de/resource/supplementary/12885_2014_4669_MOESM9_ESM.docx/9467008)
Supplement: MOESM9 [file 9467008]

Figure 3b. VAS of both groups at measured points (T0, T1, T2, T3).
